# Supplementary material for: Multilingual Language Diversity Protects Native Language Production under Different Control Demands
Source: MDPI journal article supplement (doi:10.3390/brainsci13111587), 2023-11-13
Supplement: s1 [file s1]

***Supplemental Table S2 Basic activation patterns across three conditions***

|                          | Hemisphere  | Coordinates(mm) |           |           | AllGo         |             | GoBias        |             | NoGoBias      |             |
|--------------------------|-------------|-----------------|-----------|-----------|---------------|-------------|---------------|-------------|---------------|-------------|
|                          |             | x               | y         | z         | Voxels        | Z value     | Voxels        | Z value     | Voxels        | Z value     |
| <b>Frontal pole</b>      | <b>Left</b> | <b>-50</b>      | <b>40</b> | <b>10</b> | <b>127372</b> | <b>5.18</b> | <b>116829</b> | <b>5.72</b> | <b>110644</b> | <b>5.70</b> |
| Frontal pole             | Right       | 48              | 34        | 10        |               | 5.81        |               | 5.52        |               | 5.34        |
| Paracingualte gyrus      | Left        | -2              | 32        | 28        |               | 5.55        |               | 5.17        |               | 6.06        |
| Paracingualte gyrus      | Right       | 6               | 32        | 30        |               | 5.92        |               | 4.51        |               | 5.09        |
| Anterior Cingulate gyrus | Left        | -4              | 30        | 20        |               | 5.35        |               | 4.47        |               | 5.87        |
| Anterior Cingulate gyrus | Right       | 4               | 30        | 22        |               | 5.27        |               | 6.12        |               | 6.12        |
| Frontal orbital cortex   | Left        | -32             | 30        | -2        |               | 7.11        |               | 6.21        |               | 6.72        |
| Frontal orbital cortex   | Right       | 32              | 30        | -2        |               | 6.37        |               | 5.87        |               | 5.86        |
| Superior frontal gyrus   | Left        | -4              | 20        | 52        |               | 6.62        |               | 6.53        |               | 5.71        |
| Superior frontal gyrus   | Right       | 4               | 18        | 54        |               | 6.67        |               | 6.55        |               | 6.40        |
| Insular cortex           | Left        | -30             | 16        | 8         |               | 7.27        |               | 6.91        |               | 7.08        |
| Insular cortex           | Right       | 30              | 16        | 8         |               | 7.44        |               | 6.30        |               | 6.06        |
| Inferior frontal gyrus   | Left        | -46             | 14        | 6         |               | 5.86        |               | 5.86        |               | 6.42        |
| Inferior frontal gyrus   | Right       | 50              | 14        | 2         |               | 5.82        |               | 5.16        |               | 5.74        |
| Middle frontal gyrus     | Left        | -46             | 6         | 50        |               | 5.20        |               | 5.65        |               | 4.52        |

|                          |       |     |     |     |      |      |      |
|--------------------------|-------|-----|-----|-----|------|------|------|
| Middle frontal gyrus     | Right | 48  | 6   | 50  | 5.48 | 5.59 | 5.73 |
| Precentral gyrus         | Left  | -48 | 0   | 50  | 6.65 | 6.06 | 5.85 |
| Precentral gyrus         | Right | 48  | 0   | 50  | 5.71 | 5.78 | 6.64 |
| Superior temporal gyrus  | Left  | -64 | -10 | 2   | 6.79 | 6.36 | 6.30 |
| Superior temporal gyrus  | Right | 68  | -20 | 4   | 7.27 | 6.95 | 6.29 |
| Middle temporal gyrus    | Left  | -48 | -42 | 4   | 4.32 | 5.20 | 4.68 |
| Middle temporal gyrus    | Right | 54  | -58 | 6   | 5.59 | 5.06 | 4.77 |
| Postcentral gyrus        | Left  | -24 | -34 | 52  | 4.73 | 5.08 | 4.62 |
| Postcentral gyrus        | Right | 24  | -32 | 64  | 6.63 | 5.70 | 5.62 |
| Inferior temporal gyrus  | Left  | -54 | -50 | -18 | 6.73 | 7.39 | 6.71 |
| Inferior temporal gyrus  | Right | 56  | -52 | -18 | 6.13 | 6.32 | 5.62 |
| Ligual gyrus             | Left  | -16 | -44 | -6  | 5.35 | 5.06 | 5.17 |
| Ligual gyrus             | Right | 24  | -44 | -6  | 6.07 | 5.82 | 5.08 |
| Supramarginal gyrus      | Left  | -62 | -44 | 16  | 4.95 | 4.22 | 5.08 |
| Supramarginal gyrus      | Right | 66  | -40 | 20  | 4.51 | 3.91 | 4.73 |
| Angular gyrus            | Left  | -44 | -52 | 12  | 4.26 | 3.60 | 3.13 |
| Angular gyrus            | Right | 44  | -52 | 12  | 4.83 | 4.04 | 3.48 |
| Precuneous cortex        | Left  | -18 | -60 | 6   | 5.22 | 5.04 | 5.24 |
| Precuneous cortex        | Right | 24  | -58 | 6   | 5.82 | 6.14 | 6.51 |
| Lateral occipital cortex | Left  | -44 | -74 | -14 | 6.49 | 6.55 | 6.52 |

|                          |       |     |     |     |      |      |      |
|--------------------------|-------|-----|-----|-----|------|------|------|
| Lateral occipital cortex | Right | 44  | -74 | -16 | 6.38 | 6.60 | 6.79 |
| Occipital pole           | Left  | -22 | -92 | -14 | 6.15 | 6.13 | 6.48 |
| Occipital pole           | Right | 22  | -94 | -8  | 7.14 | 7.14 | 7.33 |

---
