# Supplementary material for: Multilingual Language Diversity Protects Native Language Production under Different Control Demands
Source: MDPI journal article supplement (doi:10.3390/brainsci13111587), 2023-11-13
Supplement: s1 [file s1]

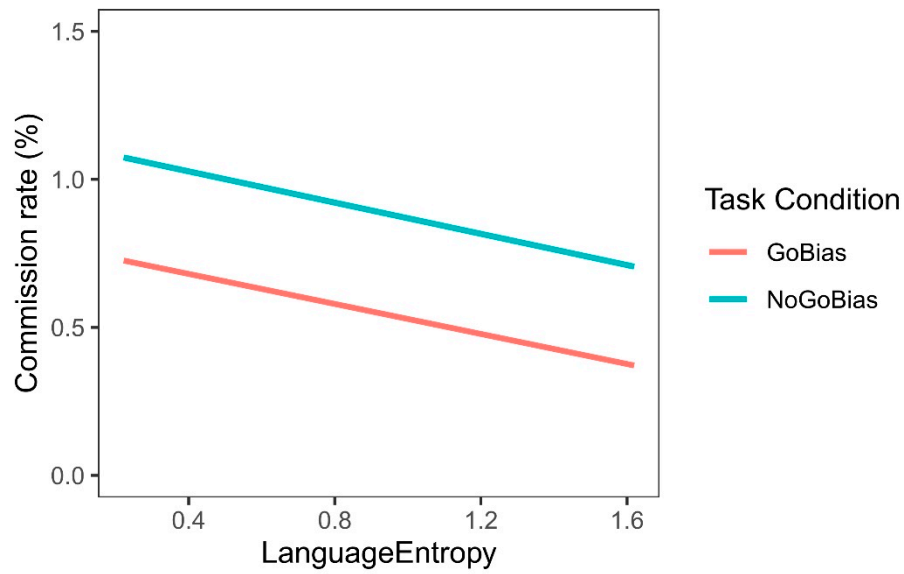

**Supplementary Figure S1** Behavioral results for the No-Go trials in Go/No-Go picture naming task. Commission error rates for No-Go trials across conditions. Commission errors refer to failures to inhibit a response on No-Go trial. The commission error rates were computed by dividing the commission errors by the total number of No-Go trials across conditions. Higher commission error rate in the No-Go Bias condition compared to the Go Bias condition. As language entropy increases, there showed a decrease trend of commission error rate.
