# Supplementary material for: Multilingual Language Diversity Protects Native Language Production under Different Control Demands
Source: Brain Sci. 2023 Nov 13;13(11):1587. doi: 10.3390/brainsci13111587 (PMC10670415; doi:10.3390/brainsci13111587)
Supplement: Supplementary file 1 [file brainsci-13-01587-s001.zip]

Archive with 5 entries (5 files):
- Figure S1 Behavioral Results for Commision Errors of No-Go Trials.pdf
- Figure S2 Behavioral Results for All of the Go Trials.pdf
- Figure S3 Basic Activation Patterns across Three Conditions.pdf
- Table S1 Network Information.xlsx
- Table S2 Basic Activation Patterns across Three Conditions.pdf
